# Supplementary material
Source: PubMed Central journal article supplement (PMC3672316)
Supplement: NIHMS474172-supplement-Supplemental_Tables.pdf [file NIHMS474172-supplement-Supplemental_Tables.pdf]

**Supplemental Table 1** – List of the 208 variants present in the EVS or 1000 genomes databases. Variants present in the EVS are listed in bold.

| Gene         | Product                          | Reference           | Mutation     |
|--------------|----------------------------------|---------------------|--------------|
| <i>SCN1A</i> | Nav1.1 (Na <sup>+</sup> channel) | Mulley et al., 2005 | Q3X          |
|              |                                  |                     | E20X         |
|              |                                  |                     | E78D         |
|              |                                  |                     | Y83X         |
|              |                                  |                     | R101Q        |
|              |                                  |                     | S103G        |
|              |                                  |                     | T112I        |
|              |                                  |                     | S128X        |
|              |                                  |                     | Y165X        |
|              |                                  |                     | G177E        |
|              |                                  |                     | D188V        |
|              |                                  |                     | W190R        |
|              |                                  |                     | R222X        |
|              |                                  |                     | I227S        |
|              |                                  |                     | I252N        |
|              |                                  |                     | G265W        |
|              |                                  |                     | W280R        |
|              |                                  |                     | E289X        |
|              |                                  |                     | <b>T297I</b> |
|              |                                  |                     | G343E        |
|              |                                  |                     | Q389X        |
|              |                                  |                     | R393H        |
|              |                                  |                     | M400del      |
|              |                                  |                     | Y426N        |
|              |                                  |                     | E435X        |
|              |                                  |                     | I448X        |
|              |                                  |                     | R568X        |
|              |                                  |                     | R712X        |
|              |                                  |                     | Y790C        |
|              |                                  |                     | T808S        |
|              |                                  |                     | R865X        |
|              |                                  |                     | T875M        |
|              |                                  |                     | F902C        |
|              |                                  |                     | R931C        |
|              |                                  |                     | W932X        |
|              |                                  |                     | M934I        |
|              |                                  |                     | H939Q        |

V944A  
R946C  
R946H  
W952X  
C959R  
M960V  
G979R  
V983A  
N985I  
L986F  
K1027X  
W1204R  
W1204X  
R1213X  
V1215X  
S1231R  
G1233R  
R1245X  
F1263L  
L1265P  
K1270T  
W1271X  
W1284X  
F1289del  
A1326P  
V1353L  
L1355P  
V1390M  
R1407X  
W1408X  
V1428A  
W1434R  
Q1450R  
L1461I  
F1463S  
S1516X  
M1558del  
V1611F  
Y1628X  
P1632S  
R1645X

R1648C  
R1648H  
I1656M  
R1657C  
F1661S  
P1668A  
G1674R  
A1685D  
A1685V  
F1692S  
Y1694C  
T1709I  
G1749E  
F1766del  
M1780T  
Y1781C  
F1805X  
F1808L  
W1812G  
W1812C  
F1831S  
M1852T  
E1881D  
R1892X  
T1909I  
R1912X  
**E1957G**

---

Harkin et al 2007

Y84C  
R101W  
Y399X  
F403L  
Y413N  
D674G  
L783P  
V944E  
F945L  
G950E  
Q965X  
E1238D  
A1441P

R1525X  
 I1545V  
 Y1598X  
 R1645Q  
 F1707V  
 T1721R  
 W1726R  
 A1783T  
 W1812X  
 R1886X  
 Q1904X  
 I1922T  
 D79H  
 I171K  
 A175T  
 D194N  
 T199R  
 T226M  
 A239T  
 W384X  
 E1008X  
 C1396G  
 Q1427X  
 A395P  
 V422E  
 S626G  
 M973V  
 F1543S  
**R1596C**  
 R1657H  
 R1636Q  
 R393C  
 G1480V

|              |                                               |                     |                                      |
|--------------|-----------------------------------------------|---------------------|--------------------------------------|
| <i>KCNQ2</i> | K <sub>v</sub> 7.2 (K <sup>+</sup> channel)   | Ottman et al., 2010 | Y284C<br>A306T                       |
| <i>KCNQ3</i> | K <sub>v</sub> 7.3 (K <sup>+</sup> channel)   |                     | G263V                                |
| <i>SCN2A</i> | Na <sub>v</sub> 1.2 (Na <sup>+</sup> channel) |                     | L1330F<br>L1563V<br>A1822V<br>T1200A |

|                |                                              |                                                                 |
|----------------|----------------------------------------------|-----------------------------------------------------------------|
|                |                                              | V892I<br>R223Q<br>R1319Q<br>L1003I<br>N1001K<br>I1596S<br>E430Q |
| <i>STXBP1</i>  | Syntaxin binding protein 1                   | G544D<br>C180Y<br>M443R<br>V84D                                 |
| <i>SCN1B</i>   | $\beta_1$ subunit (Na <sup>+</sup> channel)  | <b>C121W</b><br>R85C<br>R85H                                    |
| <i>GABRG2</i>  | $\gamma_2$ subunit (GABAA receptor)          | K289M<br>Q351X<br>R43Q                                          |
| <i>SLC2A1</i>  | GLUT1 (glucose transporter type 1)           | R223P<br>S324L<br>R126C                                         |
| <i>GABRA1</i>  | $\alpha_1$ subunit (GABAA receptor)          | A322D                                                           |
| <i>EFHC1</i>   | EF hand motif protein                        | <b>F229L</b><br>D210N<br>D253Y<br><b>P77T</b><br><b>R221H</b>   |
| <i>CHRNA4</i>  | $\alpha_4$ subunit (nACh receptor)           | S248F<br>S252L                                                  |
| <i>CHRNB2</i>  | $\beta_2$ subunit (nACh receptor)            | V287L<br>V287M                                                  |
| <i>CHRNA2</i>  | $\alpha_2$ subunit (nACh receptor)           | I279N                                                           |
| <i>LGII</i>    | Leucine-rich repeat protein                  | C46R<br>E383A                                                   |
| <i>KCNMA1</i>  | K <sub>Ca</sub> 1.1 (K <sup>+</sup> channel) | D434G                                                           |
| <i>SLC2A1</i>  | glucose transporter type 1                   | S95I<br>V140M<br>N317T<br>A275T<br>G314S                        |
| <i>CACNA1A</i> | Ca <sub>v</sub> 2.1 (Ca <sup>2+</sup>        | R1820X                                                          |

|               | channel)                                    |       |
|---------------|---------------------------------------------|-------|
| <i>KCNA1</i>  | K <sub>v</sub> 1.1 (K <sup>+</sup> channel) | E147K |
|               |                                             | T226R |
|               |                                             | A242P |
|               |                                             | P244H |
|               |                                             | R417X |
|               |                                             | V404I |
| <i>ATP1A2</i> | Sodium-potassium ATPase                     | R689Q |
|               |                                             | M731T |
|               |                                             | G900R |
|               |                                             | C702Y |
